# Supplementary material
Source: Springer Nature journal article supplement (https://www.springermedizin.de/resource/supplementary/12936_2010_1325_MOESM1_ESM.pdf/9549524)

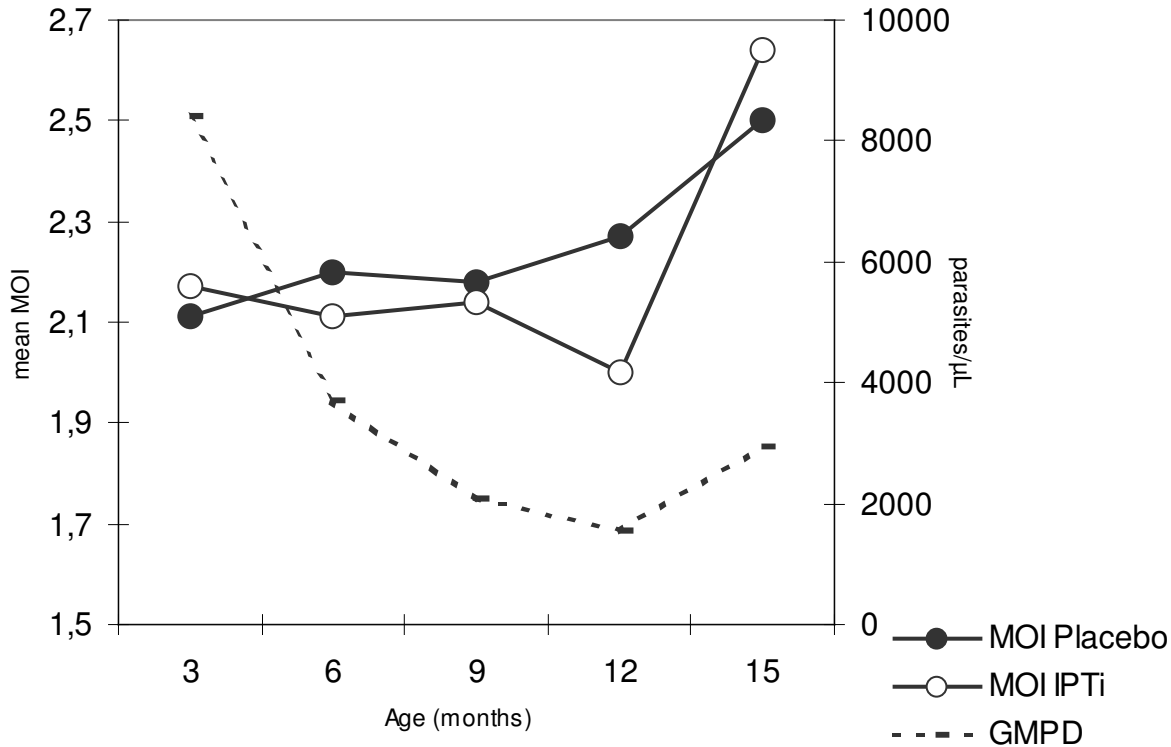

Supplement: MOESM1 [file 9549524]
